# Supplementary material for: Structural and anionic effects of microcrystalline Zn-CPs on 4-nitrophenol sensing performances
Source: Royal Society of Chemistry journal article supplement (doi:10.1039/d2ra01239a), 2022-01-01
Supplement: d2ra01239a1.pdf [file d2ra01239a1.pdf]

**Electronic Supplementary Information (ESI)**

**Structural and Anionic Effects of Microcrystalline Zn-CPs on 4-Nitrophenol Sensing  
Performances**

Hyemin Lee<sup>1</sup>, Min-Yeong Kim<sup>\*,2</sup>, and Haeri Lee<sup>\*,1</sup>

<sup>1</sup>Department of Chemistry, Hannam University, Daejeon, 34054, Republic of Korea

<sup>2</sup>Department of Electrochemistry, Korea Institute of Materials Science (KIMS), Changwon,  
51508, Republic of Korea

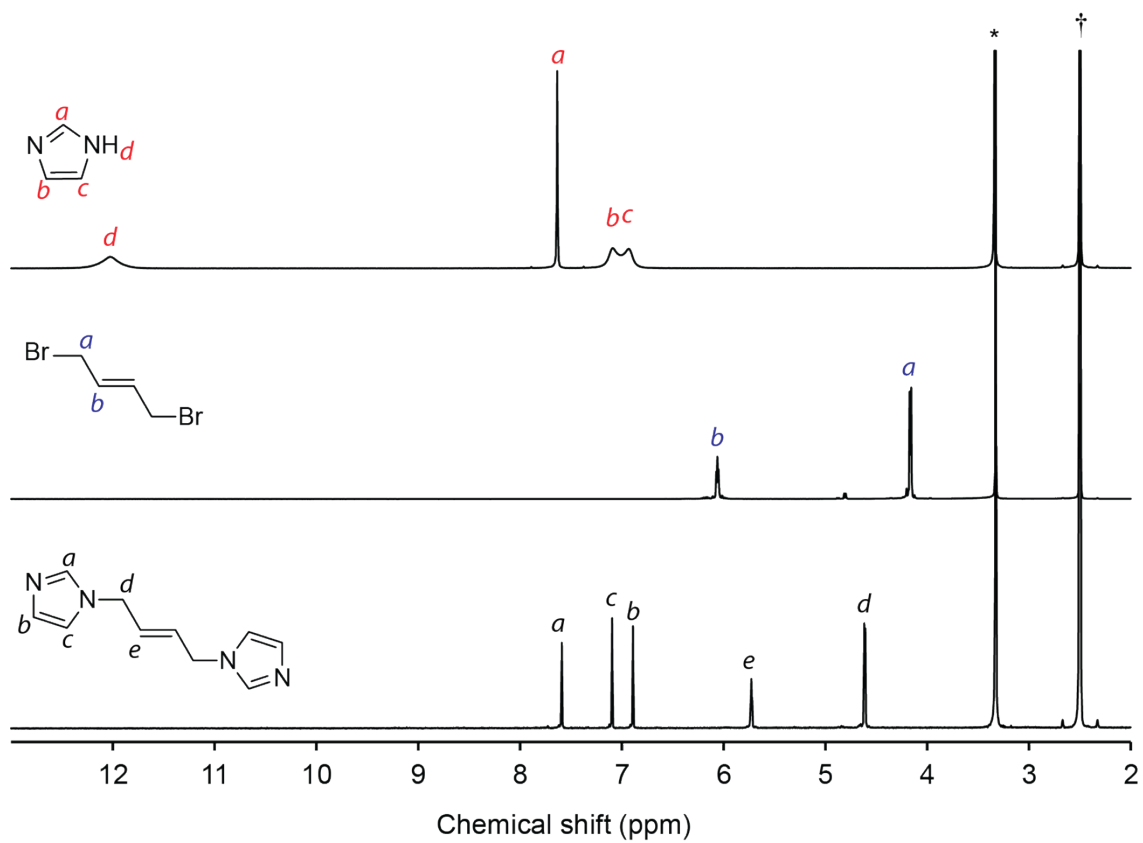

**Figure S1.**  $^1\text{H}$  NMR spectrum for starting materials and **L** in  $\text{DMSO-}d_6$  ( $\dagger\text{CD}_2\text{HSOCD}_2\text{H}$ ,  $^*\text{H}_2\text{O}$ ).

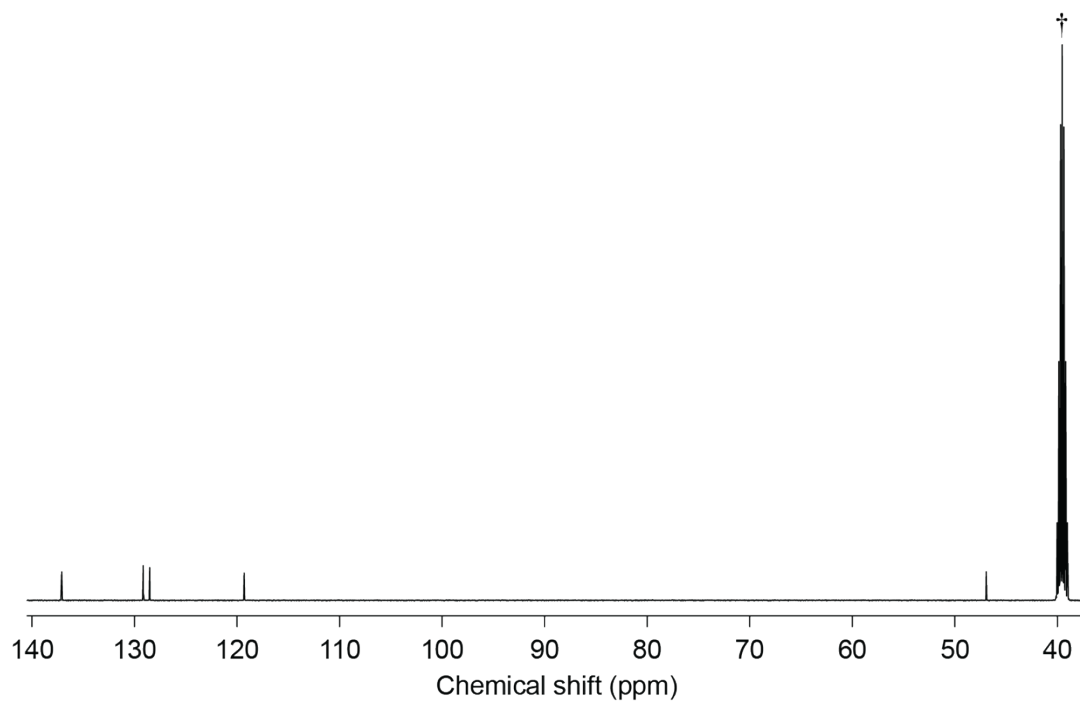

**Figure S2.**  $^{13}\text{C}$  NMR spectrum for **L** in  $\text{DMSO-}d_6$  ( $^+\text{CD}_2\text{HSOCD}_2\text{H}$ ,  $^*\text{H}_2\text{O}$ ).

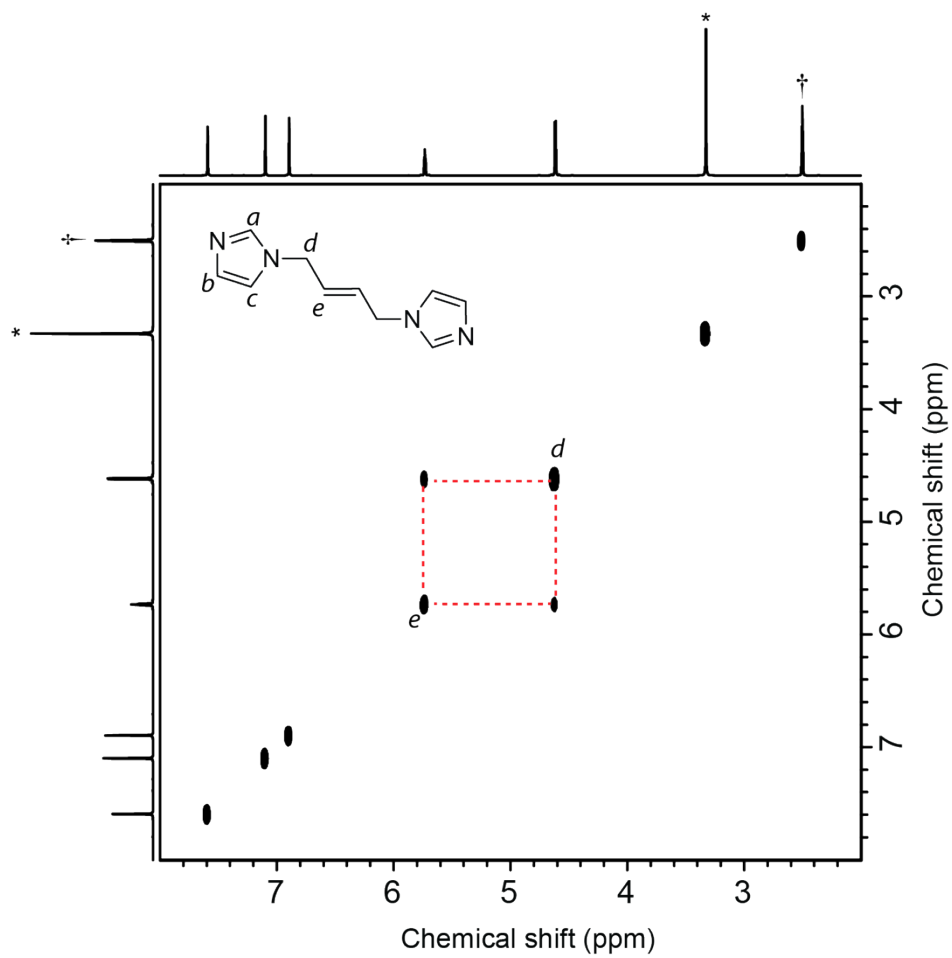

**Figure S3.**  $^1\text{H}$ - $^1\text{H}$  COSY spectrum for **L** in  $\text{DMSO-}d_6$  ( $^{\dagger}\text{CD}_2\text{HSOCD}_2\text{H}$ ,  $^*\text{H}_2\text{O}$ ).

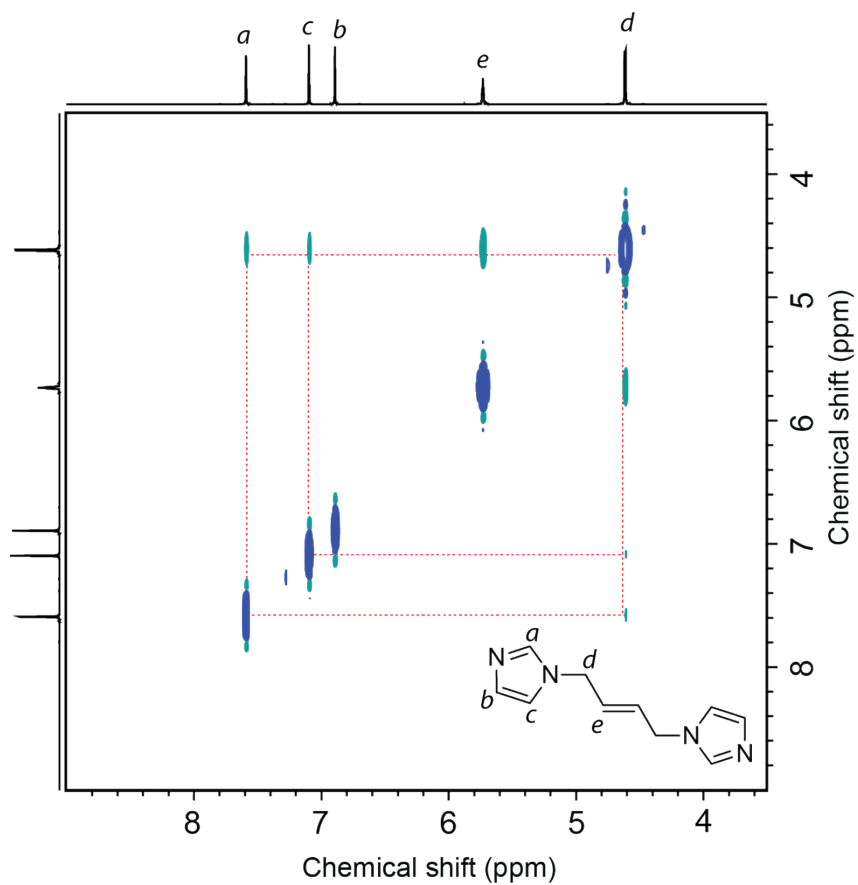

**Figure S4.**  $^1\text{H}$ - $^1\text{H}$  NOESY spectrum for **L** in  $\text{DMSO-}d_6$ .

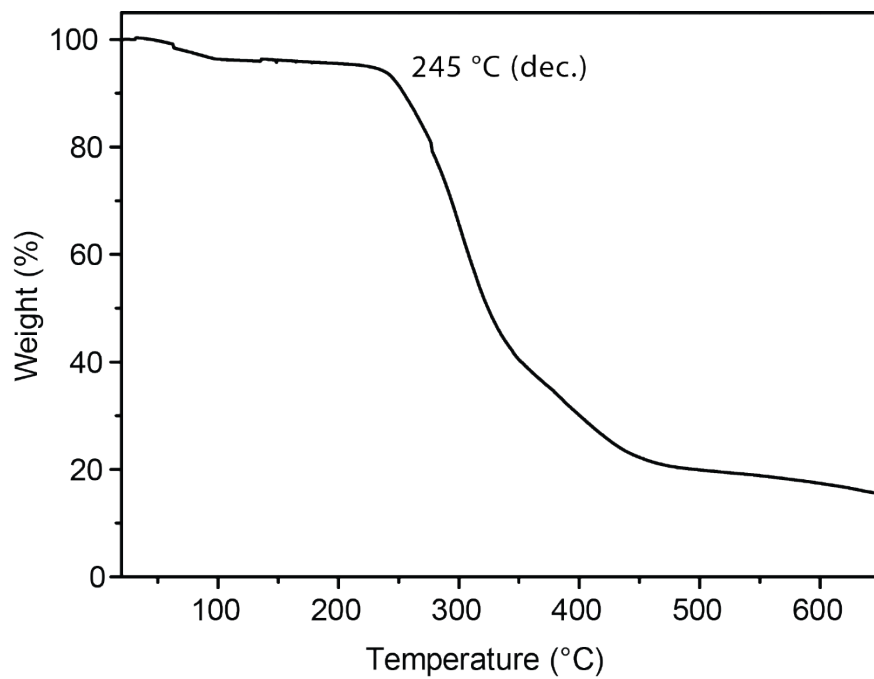

**Figure S5.** TG analysis for L.

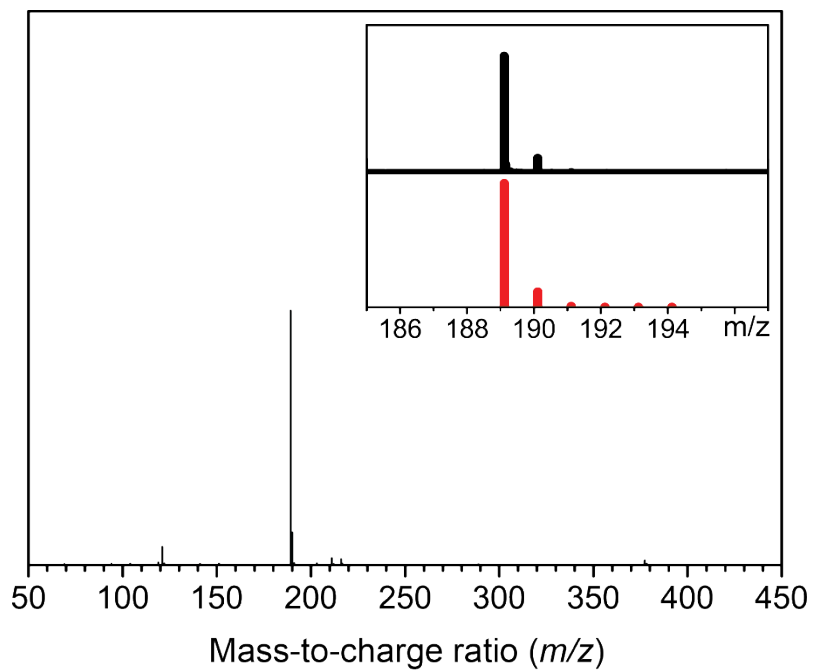

**Figure S6.** High-resolution ESI-Mass spectrum for **L**,  $m/z$  189.1140 (black, inset) and calcd for  $[C_{10}H_{12}N_2 + H^+]^+ = 189.1140$  (red, inset).

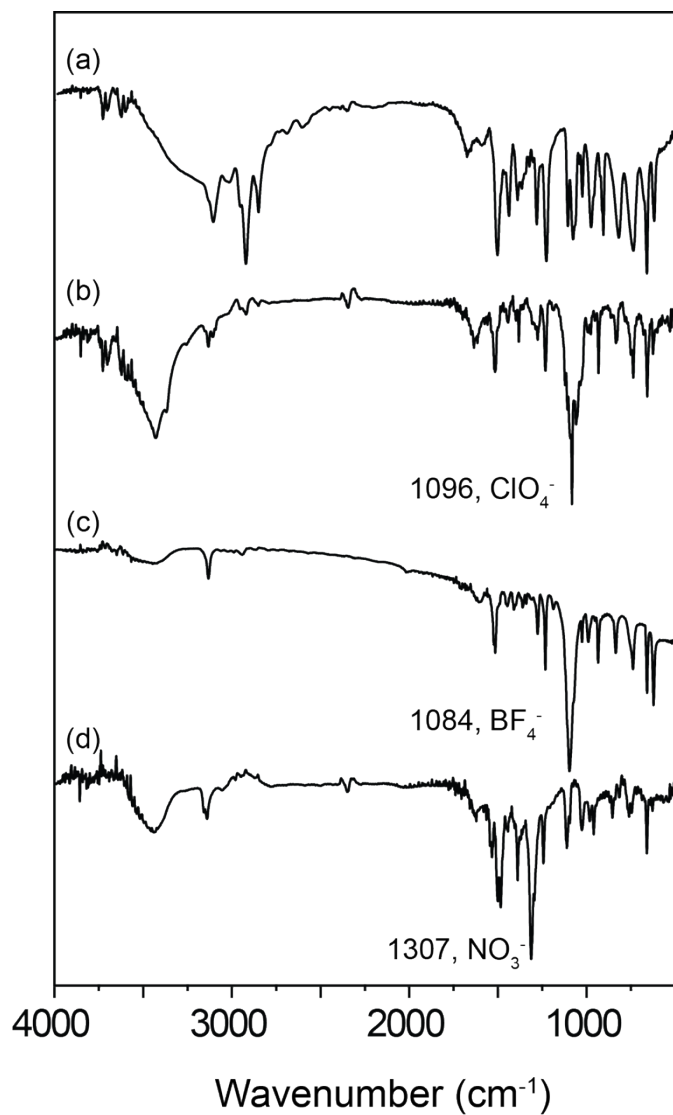

**Figure S7.** FT-IR spectra for **L** (a),  $[\text{ZnL}_3]_n(\text{ClO}_4)_{2n}$  (b),  $[\text{ZnL}_3]_n(\text{BF}_4)_{2n}$  (c), and  $[\text{Zn}_2(\text{NO}_3)_4\text{L}_3]_n$  (d).



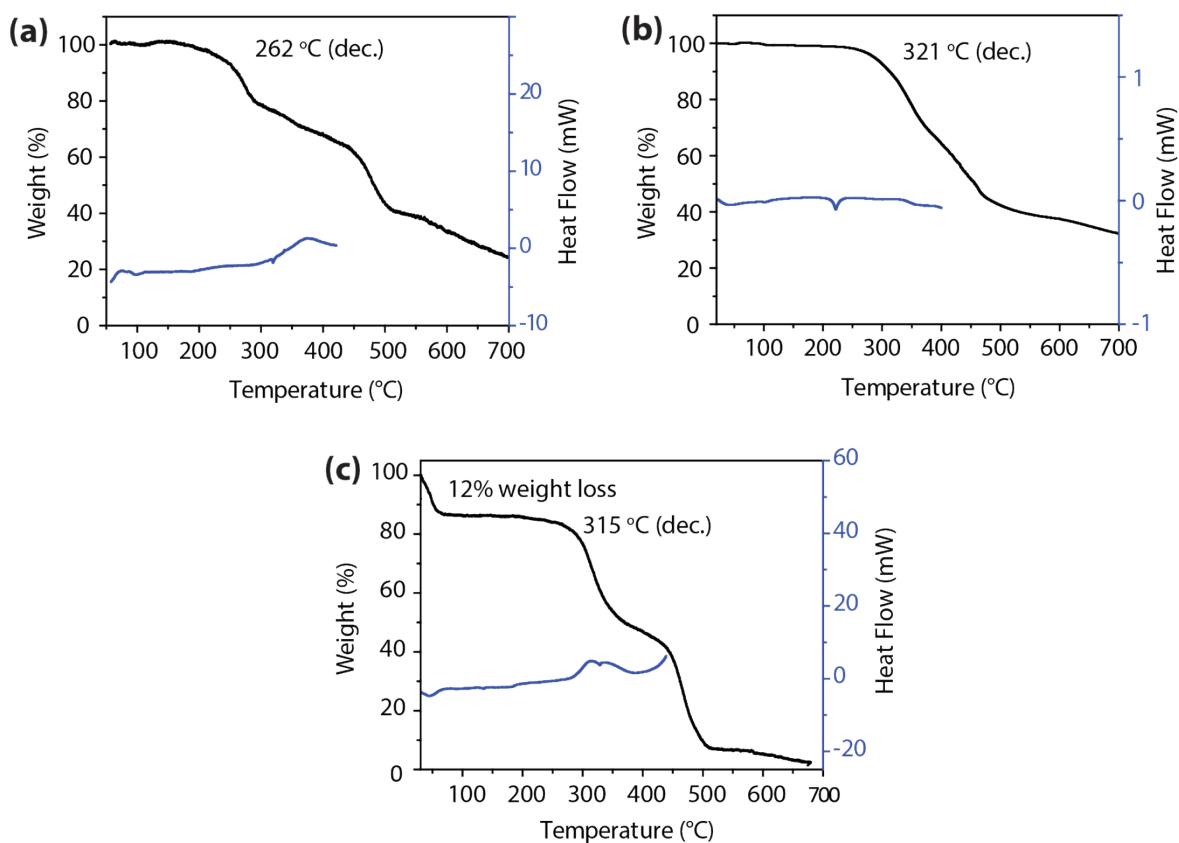

**Figure S8.** TG analyses and DSC curves for  $[\text{ZnL}_3]_n(\text{ClO}_4)_{2n}$  (a),  $[\text{ZnL}_3]_n(\text{BF}_4)_{2n}$  (b), and  $[\text{Zn}_2(\text{NO}_3)_4\text{L}_3]_n$  (c). For  $[\text{Zn}_2(\text{NO}_3)_4\text{L}_3]_n$ , 12% weight loss in a range of 25 to 50 °C refers to the evaporation of  $\text{CHCl}_3$  which is the mother liquid for crystallization.

## Refinement Details

Most disagreeable reflections were omitted by OMIT instruction.

For  $[\text{Zn}_2(\text{NO}_3)_4\text{L}_3]_n$ , disordered solvate molecules were squeezed out by Platon.<sup>1</sup>

# SQUEEZE RESULTS (Version = 140621)

# Note: Data are Listed for all Voids in the P1 Unit Cell

# i.e. Centre of Gravity, Solvent Accessible Volume,

# Recovered number of Electrons in the Void and

# Details about the Squeezed Material

loop\_

  \_platon\_squeeze\_void\_nr

  \_platon\_squeeze\_void\_average\_x

  \_platon\_squeeze\_void\_average\_y

  \_platon\_squeeze\_void\_average\_z

  \_platon\_squeeze\_void\_volume

  \_platon\_squeeze\_void\_count\_electrons

  \_platon\_squeeze\_void\_content

|   |       |       |       |     |       |
|---|-------|-------|-------|-----|-------|
| 1 | 0.000 | 0.000 | 0.500 | 121 | 32 '' |
|---|-------|-------|-------|-----|-------|

**Table S1.** Selected bond lengths and angles for  $[\text{ZnL}_3]_n(\text{BF}_4)_{2n}$ ,  $[\text{ZnL}_3]_n(\text{ClO}_4)_{2n}$ , and  $[\text{Zn}_2(\text{NO}_3)_4\text{L}_3]_n$

| $[\text{ZnL}_3]_n(\text{BF}_4)_{2n}$ |            | $[\text{ZnL}_3]_n(\text{ClO}_4)_{2n}$ |            | $[\text{Zn}_2(\text{NO}_3)_4\text{L}_3]_n$ |            |
|--------------------------------------|------------|---------------------------------------|------------|--------------------------------------------|------------|
| Zn(1)-N(1)#1                         | 2.192(3)   | Zn(1)-N(2)#1                          | 2.1949(13) | Zn(1)-N(1)                                 | 1.9809(18) |
| Zn(1)-N(1)#2                         | 2.192(3)   | Zn(1)-N(2)#2                          | 2.1949(13) | Zn(1)-N(3)                                 | 1.9984(17) |
| Zn(1)-N(1)#3                         | 2.192(3)   | Zn(1)-N(2)#3                          | 2.1949(13) | Zn(1)-N(5)                                 | 2.0088(18) |
| Zn(1)-N(1)#4                         | 2.192(3)   | Zn(1)-N(2)#4                          | 2.1949(13) | Zn(1)-O(1)                                 | 2.0730(17) |
| Zn(1)-N(1)#5                         | 2.192(3)   | Zn(1)-N(2)#5                          | 2.1949(13) | N(1)-Zn(1)-N(3)                            | 115.21(7)  |
| Zn(1)-N(1)                           | 2.192(3)   | Zn(1)-N(2)                            | 2.1949(13) | N(1)-Zn(1)-N(5)                            | 116.98(7)  |
| N(1)#1-Zn(1)-N(1)#2                  | 180.00(9)  | N(2)#1-Zn(1)-N(2)#2                   | 92.43(5)   | N(3)-Zn(1)-N(5)                            | 121.92(7)  |
| N(1)#1-Zn(1)-N(1)#3                  | 91.96(10)  | N(2)#1-Zn(1)-N(2)#3                   | 87.57(5)   | N(1)-Zn(1)-O(1)                            | 102.89(8)  |
| N(1)#2-Zn(1)-N(1)#3                  | 88.04(10)  | N(2)#2-Zn(1)-N(2)#3                   | 180.00(6)  | N(3)-Zn(1)-O(1)                            | 102.99(8)  |
| N(1)#1-Zn(1)-N(1)#4                  | 88.04(10)  | N(2)#1-Zn(1)-N(2)#4                   | 87.57(5)   | N(5)-Zn(1)-O(1)                            | 88.70(7)   |
| N(1)#2-Zn(1)-N(1)#4                  | 91.96(10)  | N(2)#2-Zn(1)-N(2)#4                   | 87.57(5)   |                                            |            |
| N(1)#3-Zn(1)-N(1)#4                  | 180.00(11) | N(2)#3-Zn(1)-N(2)#4                   | 92.43(5)   |                                            |            |
| N(1)#1-Zn(1)-N(1)#5                  | 91.96(10)  | N(2)#1-Zn(1)-N(2)#5                   | 92.43(5)   |                                            |            |
| N(1)#2-Zn(1)-N(1)#5                  | 88.04(10)  | N(2)#2-Zn(1)-N(2)#5                   | 92.43(5)   |                                            |            |
| N(1)#3-Zn(1)-N(1)#5                  | 91.96(10)  | N(2)#3-Zn(1)-N(2)#5                   | 87.57(5)   |                                            |            |
| N(1)#4-Zn(1)-N(1)#5                  | 88.04(10)  | N(2)#4-Zn(1)-N(2)#5                   | 180.00(12) |                                            |            |
| N(1)#1-Zn(1)-N(1)                    | 88.04(10)  | N(2)#1-Zn(1)-N(2)                     | 180        |                                            |            |
| N(1)#2-Zn(1)-N(1)                    | 91.96(10)  | N(2)#2-Zn(1)-N(2)                     | 87.57(5)   |                                            |            |
| N(1)#3-Zn(1)-N(1)                    | 88.04(10)  | N(2)#3-Zn(1)-N(2)                     | 92.43(5)   |                                            |            |
| N(1)#4-Zn(1)-N(1)                    | 91.96(10)  | N(2)#4-Zn(1)-N(2)                     | 92.43(5)   |                                            |            |
| N(1)#5-Zn(1)-N(1)                    | 180        | N(2)#5-Zn(1)-N(2)                     | 87.57(5)   |                                            |            |

#1  $y, -x+y, -z+2$  #2  $-y, x-y, z$  #3  $x-y, x, -z+2$  #4  $-x+y, -x, z$  #5  $-x, -y, -z+2$

#1  $-x, -y, -z$  #2  $x-y, x, -z$  #3  $-x+y, -x, z$  #4  $-y, x-y, z$  #5  $y, -x+y, -z$

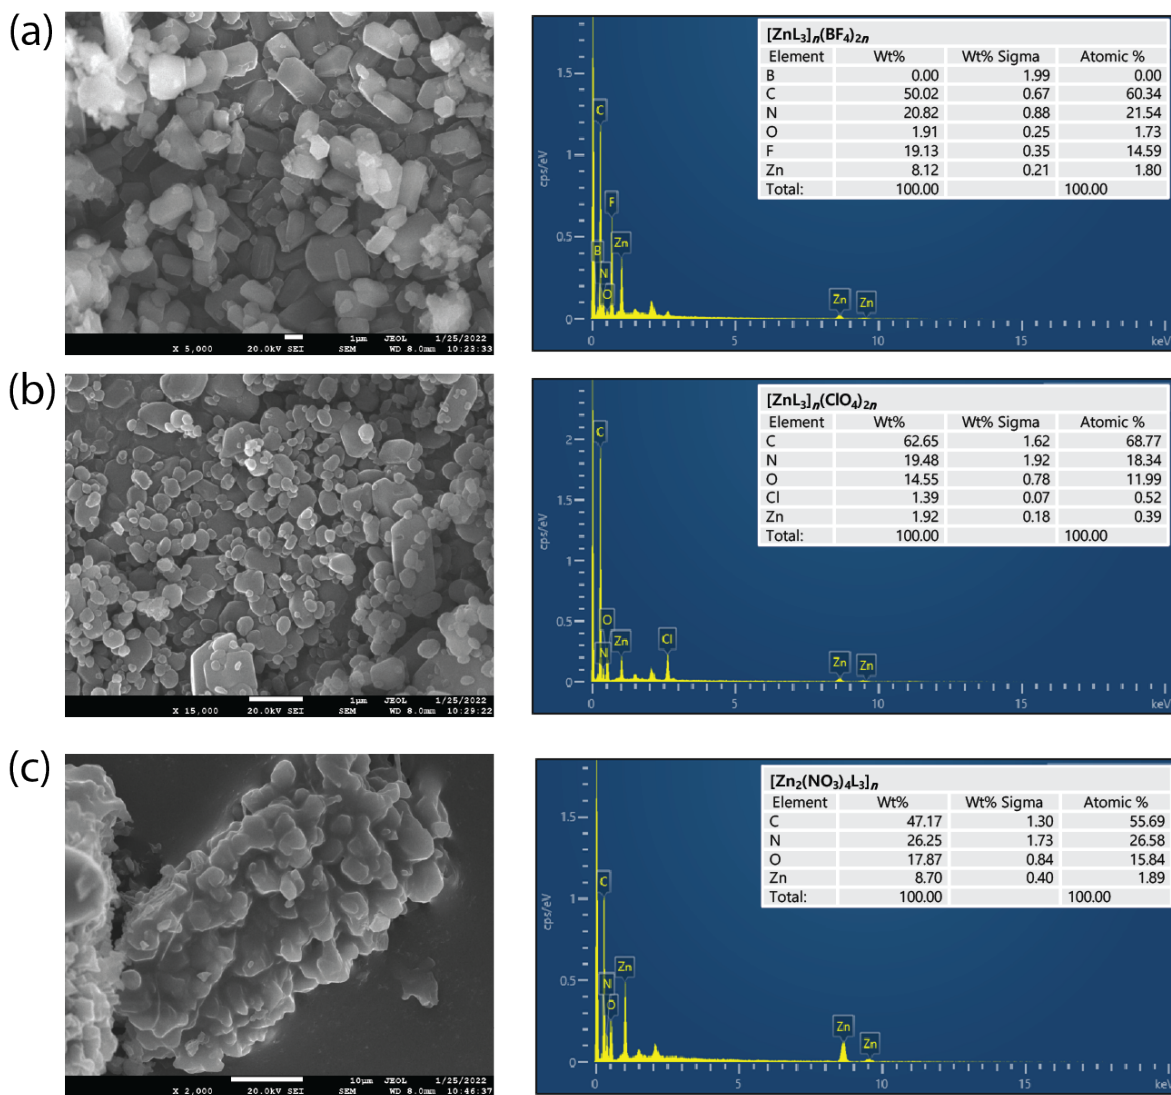

**Figure S9.** SEM images and EDS data for microcrystals were obtained after the deposition on SPEC working electrode from the dispersion in an aqueous solution for [ZnL<sub>3</sub>]<sub>n</sub>(BF<sub>4</sub>)<sub>2n</sub> (a), [ZnL<sub>3</sub>]<sub>n</sub>(ClO<sub>4</sub>)<sub>2n</sub> (b), and [Zn<sub>2</sub>(NO<sub>3</sub>)<sub>4</sub>L<sub>3</sub>]<sub>n</sub> (c).

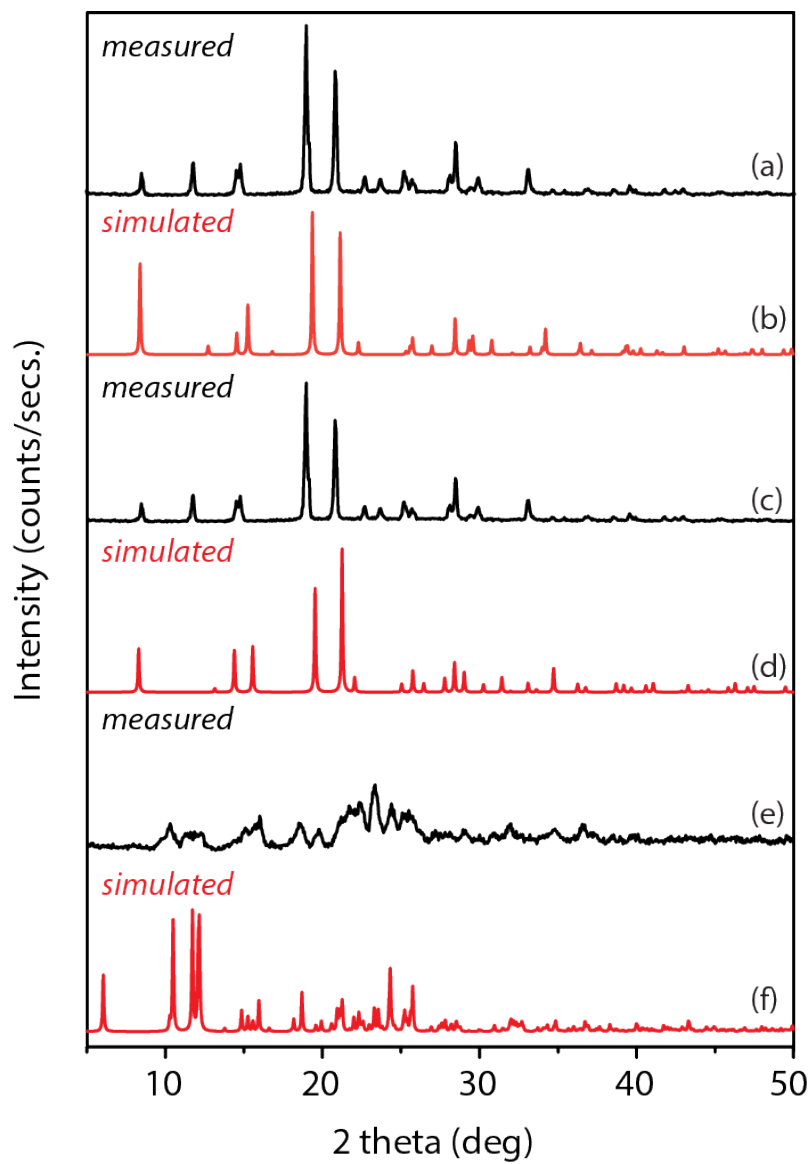

**Figure S10.** Powder XRD patterns for  $[\text{ZnL}_3]_n(\text{BF}_4)_{2n}$  (a, b),  $[\text{ZnL}_3]_n(\text{ClO}_4)_{2n}$  (c, d), and  $[\text{Zn}_2(\text{NO}_3)_4\text{L}_3]_n$  (e, f).

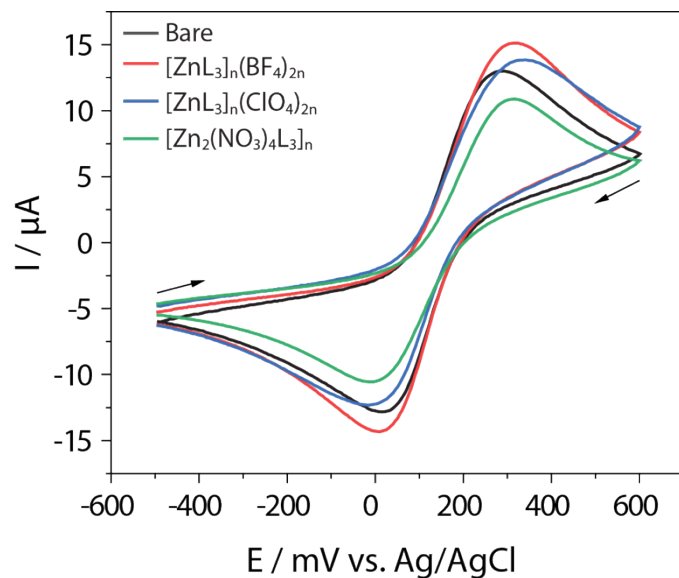

**Figure S11.** Electron transport behaviors of bare,  $[\text{ZnL}_3]_n(\text{BF}_4)_{2n}$ ,  $[\text{ZnL}_3]_n(\text{ClO}_4)_{2n}$ , and  $[\text{Zn}_2(\text{NO}_3)_4\text{L}_3]_n$  electrodes at scan rate  $50 \text{ mV s}^{-1}$ . The  $[\text{Zn}_2(\text{NO}_3)_4\text{L}_3]_n$  electrode showed low electrochemical activity due to structural instability. In particular,  $[\text{ZnL}_3]_n(\text{BF}_4)_{2n}$  showed the highest electrochemical activity among the three zinc(II) materials, which indicates that modified on the electrode surface with  $[\text{ZnL}_3]_n(\text{BF}_4)_{2n}$  effectively accelerated electron transfer process between the molecules and the electrode surface.

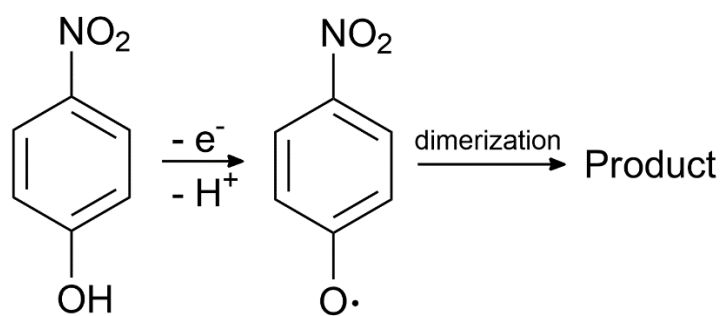

**Figure S12.** Proposed mechanism for 4-NP oxidation under present conditions.

## Reference

- 1 A. L. Spek, PLATON SQUEEZE: a tool for the calculation of the disordered solvent contribution to the calculated structure factors, *Acta Crystallogr. Sect. C Struct. Chem.*, 2015, **71**, 9–18.
